# Supplementary material for: Alterations in Immune Response Profile of Tumor-Draining Lymph Nodes after High-Intensity Focused Ultrasound Ablation of Breast Cancer Patients
Source: MDPI journal article supplement (doi:10.3390/cells10123346), 2021-11-29
Supplement: s1 [file s1]

**Supplementary Table S1 Primary Antibodies Used for Immunohistochemical Staining**

| Antigen    | Clone   | Isotype | Location of positive staining | Major specificity                             | Supplier   |
|------------|---------|---------|-------------------------------|-----------------------------------------------|------------|
| CD3        | PS1     | IgG2a   | Cell membrane                 | T lymphocytes                                 | Maxim      |
| CD4        | 1F6     | IgG1    | Cell membrane                 | Helper/inducer T lymphocytes                  | Novocastra |
| CD8        | C8/144B | IgG1/k  | Cell membrane, cytoplasm      | Cytotoxic/suppressor T lymphocytes            | Maxim      |
| CD20       | L26     | IgG2a   | Cell membrane                 | B lymphocytes                                 | Maxim      |
| CD57       | HK1     | IgM/k   | Cell membrane                 | Natural killer cells                          | Maxim      |
| Fas ligand | 5D1     | IgM     | Cytoplasm                     | Cytotoxic T lymphocytes, natural killer cells | Maxim      |
| Granzyme   | GZB01   | IgG2a   | Cytoplasm                     | Cytotoxic T lymphocytes, natural killer cells | Maxim      |
| Perforin   | 5B10    | IgG1    | Cytoplasm                     | Cytotoxic T lymphocytes, natural killer cells | Novocastra |

**Supplementary Table S2 Clinical and Pathological Characteristics of the Breast Cancer Patients**

|                              | Control Group | HIFU Group | P Value |
|------------------------------|---------------|------------|---------|
| No. of patients              | 25            | 23         |         |
| Age (years)                  | 45.5 ± 1.2    | 46.5 ± 1.7 | .87     |
| Range                        | 29 - 70       | 23 - 60    |         |
| Lymph node tumor involvement |               |            | .24     |
| N0 (Tumor-free)              | 13 (52%)      | 12 (52.2%) |         |
| N1 (1-3)                     | 6 (24%)       | 5 (21.7%)  |         |
| N2 (4-9)                     | 6 (24%)       | 6 (26.1%)  |         |
| TNM stage                    |               |            | .51     |
| I                            | 2 (8%)        | 2 (8.7%)   |         |
| II                           | 22 (88%)      | 21 (91.3%) |         |
| III                          | 1 (4%)        | 0 (0%)     |         |
| Histological diagnosis       |               |            | .46     |
| Infiltrating duct            | 19 (76%)      | 21 (91.3%) |         |
| Lobular carcinoma in situ    | 2 (8%)        | 2 (8.7%)   |         |
| Medullary                    | 2 (8%)        | 0 (0%)     |         |
| Mucinous                     | 2 (8%)        | 0 (0%)     |         |
| Tumor size (cm)              | 3.5 ± 0.23    | 3.1 ± 0.79 | .76     |
| Range                        | 1.8 - 5.6     | 2.0 - 4.7  |         |
